# Supplementary material for: PEDF and PEDF-derived peptide 44mer protect cardiomyocytes against hypoxia-induced apoptosis and necroptosis via anti-oxidative effect
Source: PubMed Central journal article supplement — Sci Rep. 2014 Jul 11;4:5637. doi: 10.1038/srep05637 (PMC4092347; doi:10.1038/srep05637), 2014-07-11
Supplement: srep05637-s1.pdf [file srep05637-s1.pdf]

**PEDF and PEDF-derived peptide 44mer protect cardiomyocytes against hypoxia-induced apoptosis and necroptosis via anti-oxidative effect**

Xiao Gao, Hao Zhang, Wei Zhuang, Guangda Yuan, Teng Sun, Xia Jiang, Zhongxin Zhou, Honghua Yuan, Zhongming Zhang, Hongyan Dong

**Supplementary Figure 1**

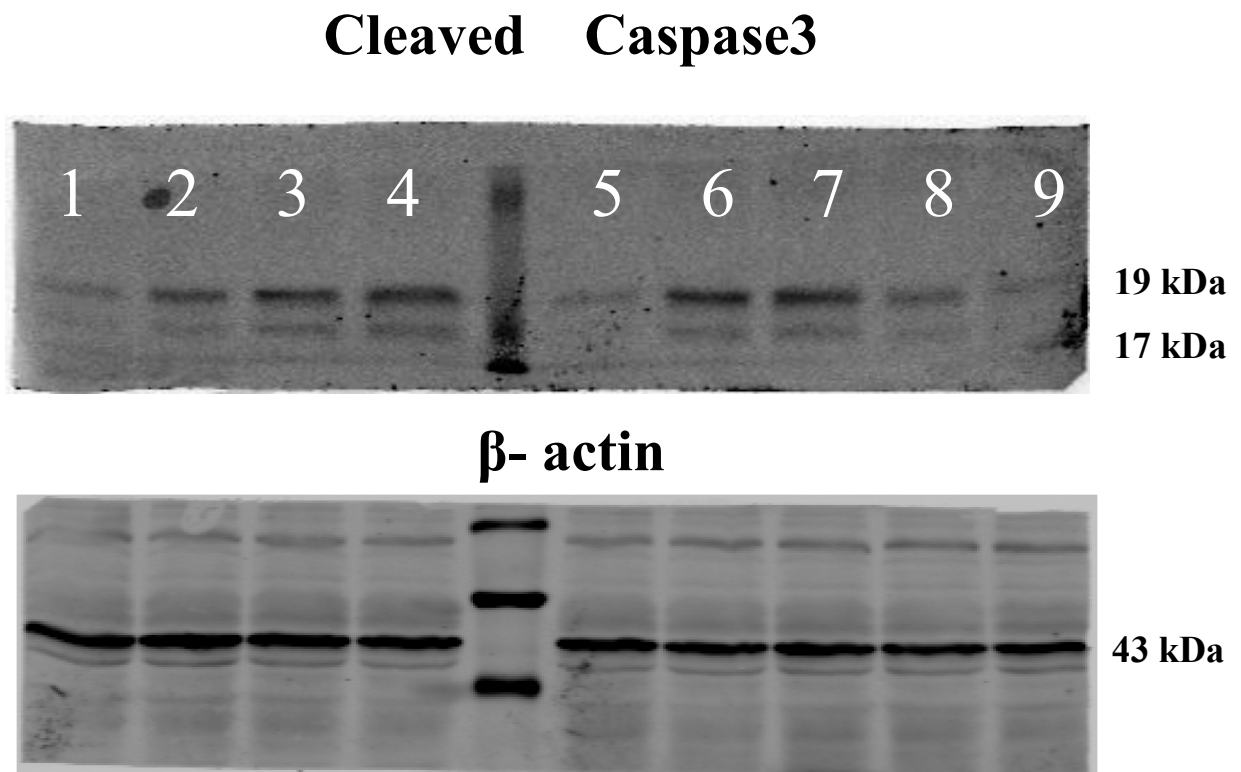

Supplementary Figure 1: Full-length blots for Figure 1c and 2b.

Ctrl(lane 1), hypoxia 12h(lane2), hypoxia 24h(lane3), hypoxia 48h(lane4).

Ctrl(lane 5), hypoxia 24h(lane6), hypoxia 24h + 34mer (lane7), hypoxia 24h + 44mer

(lane8), hypoxia 24h + PEDF (lane9).

**Supplementary Figure 2**

**RIP3**

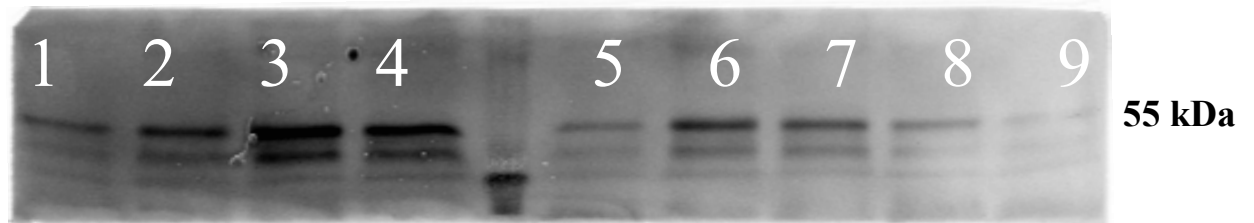

**$\beta$ - actin**

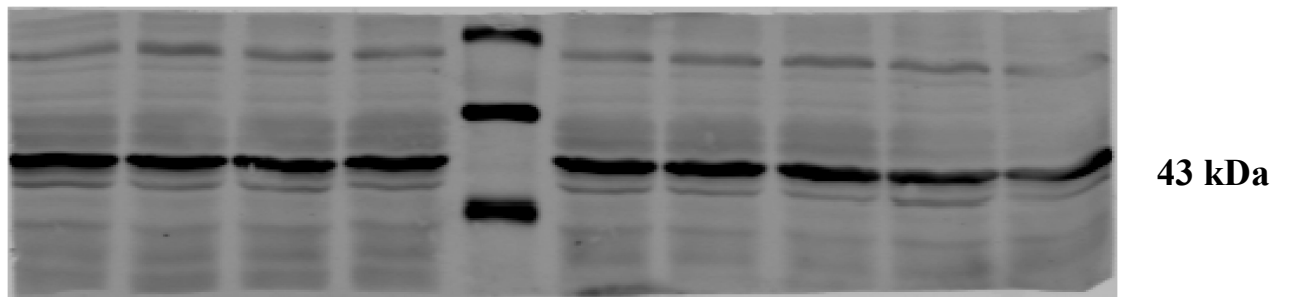

Supplementary Figure 2: Full-length blots for Figure 1c and 2b.

Ctrl(lane 1), hypoxia 12h(lane2), hypoxia 24h(lane3), hypoxia 48h(lane4).

Ctrl(lane 5), hypoxia 24h(lane6), hypoxia 24h + 34mer (lane7), hypoxia 24h + 44mer (lane8), hypoxia 24h + PEDF (lane9).

**Supplementary Figure 3**

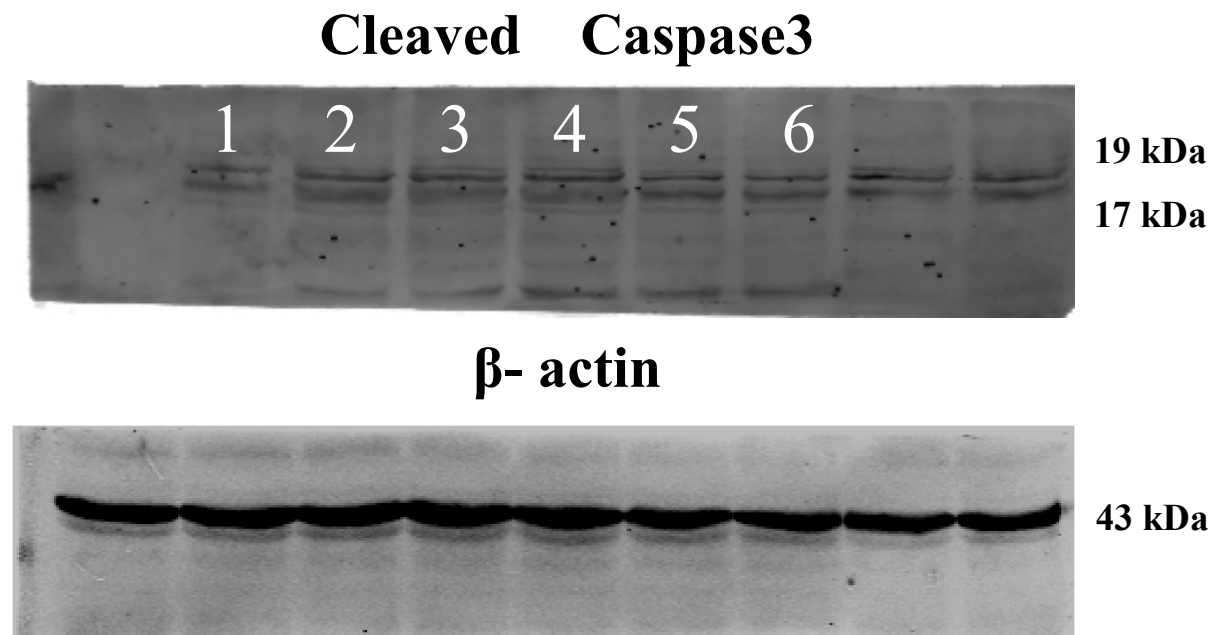

Supplementary Figure 3: Full-length blots for Figure 3a.

Ctrl (lane 1), hypoxia (lane 2), hypoxia + nec-1 (lane 3), hypoxia + nec-1 + 34mer (lane 4), hypoxia + nec-1 + 44mer (lane 5), hypoxia + nec-1 + PEDF (lane 6).

**Supplementary Figure 4**

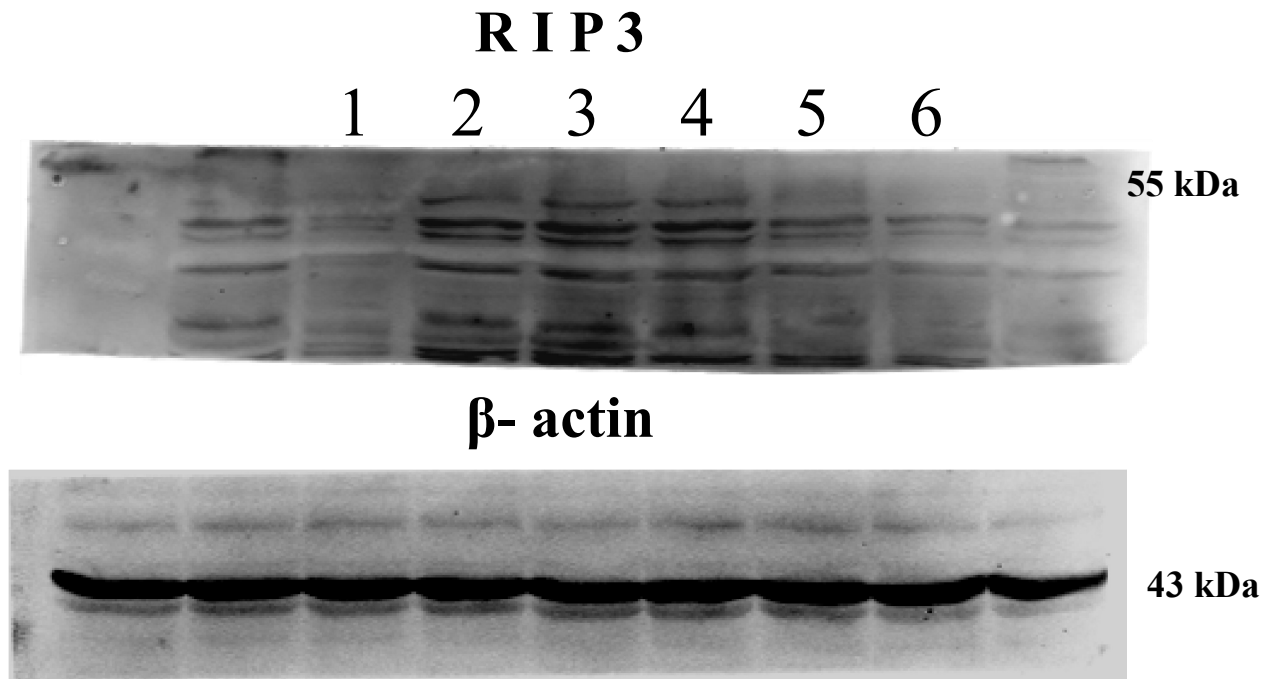

Supplementary Figure 4: Full-length blots for Figure 3b.

Ctrl (lane 1), hypoxia (lane 2), hypoxia + Z-VAD-FMK (lane 3), hypoxia + Z-VAD-FMK + 34mer (lane 4), hypoxia + Z-VAD-FMK + 44mer (lane 5), hypoxia + Z-VAD-FMK + PEDF (lane 6).
